# Supplementary material
Source: PubMed Central journal article supplement (PMC5515716)
Supplement: NIHMS872169-supplement-1.pdf [file NIHMS872169-supplement-1.pdf]

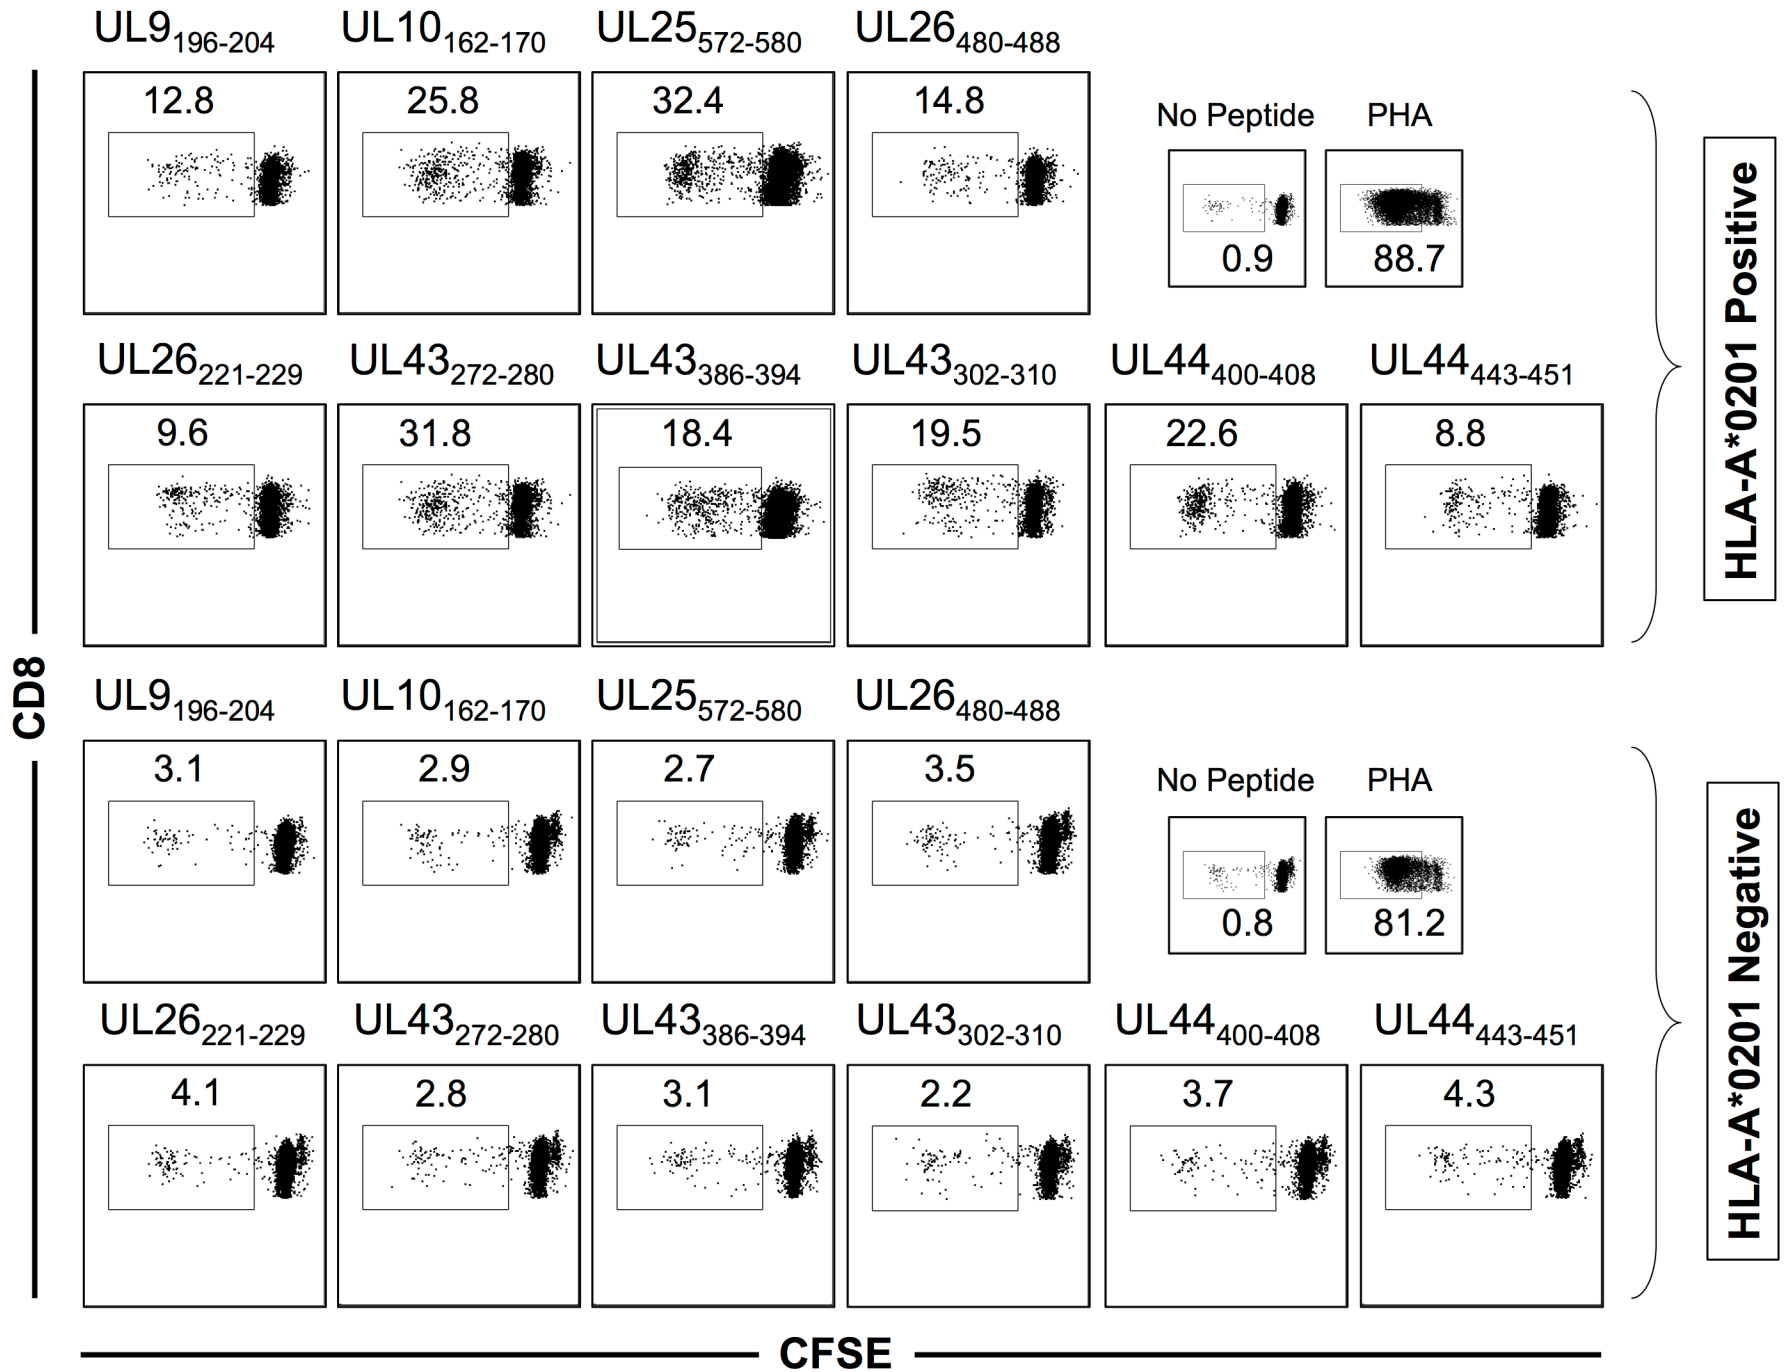

**Suppl. Figure S1: Frequencies of HSV-1 epitopes-specific proliferative CFSE<sup>low</sup>CD8<sup>+</sup> T cells detected in HSV-seropositive HLA-A\*0201 positive and HLA-A\*0201 negative individuals.** Proliferative response of CD8<sup>+</sup> T cells isolated from HLA-A\*0201 positive and negative HSV-1 seropositive individuals by CFSE dilution method after *in vitro* stimulation with individual peptides. Top two rows show contour plots of individual tetramer specific CFSE<sup>low</sup>CD8<sup>+</sup> T cells in HLA-A\*0201-positive, HSV-1-seropositive individuals. Bottom two rows show contour plots of individual tetramer specific CFSE<sup>low</sup>CD8<sup>+</sup> T cells in HLA-A\*0201-negative controls. The small contour plots in top right corner of each row show negative controls (no peptide) and positive controls (PHA).

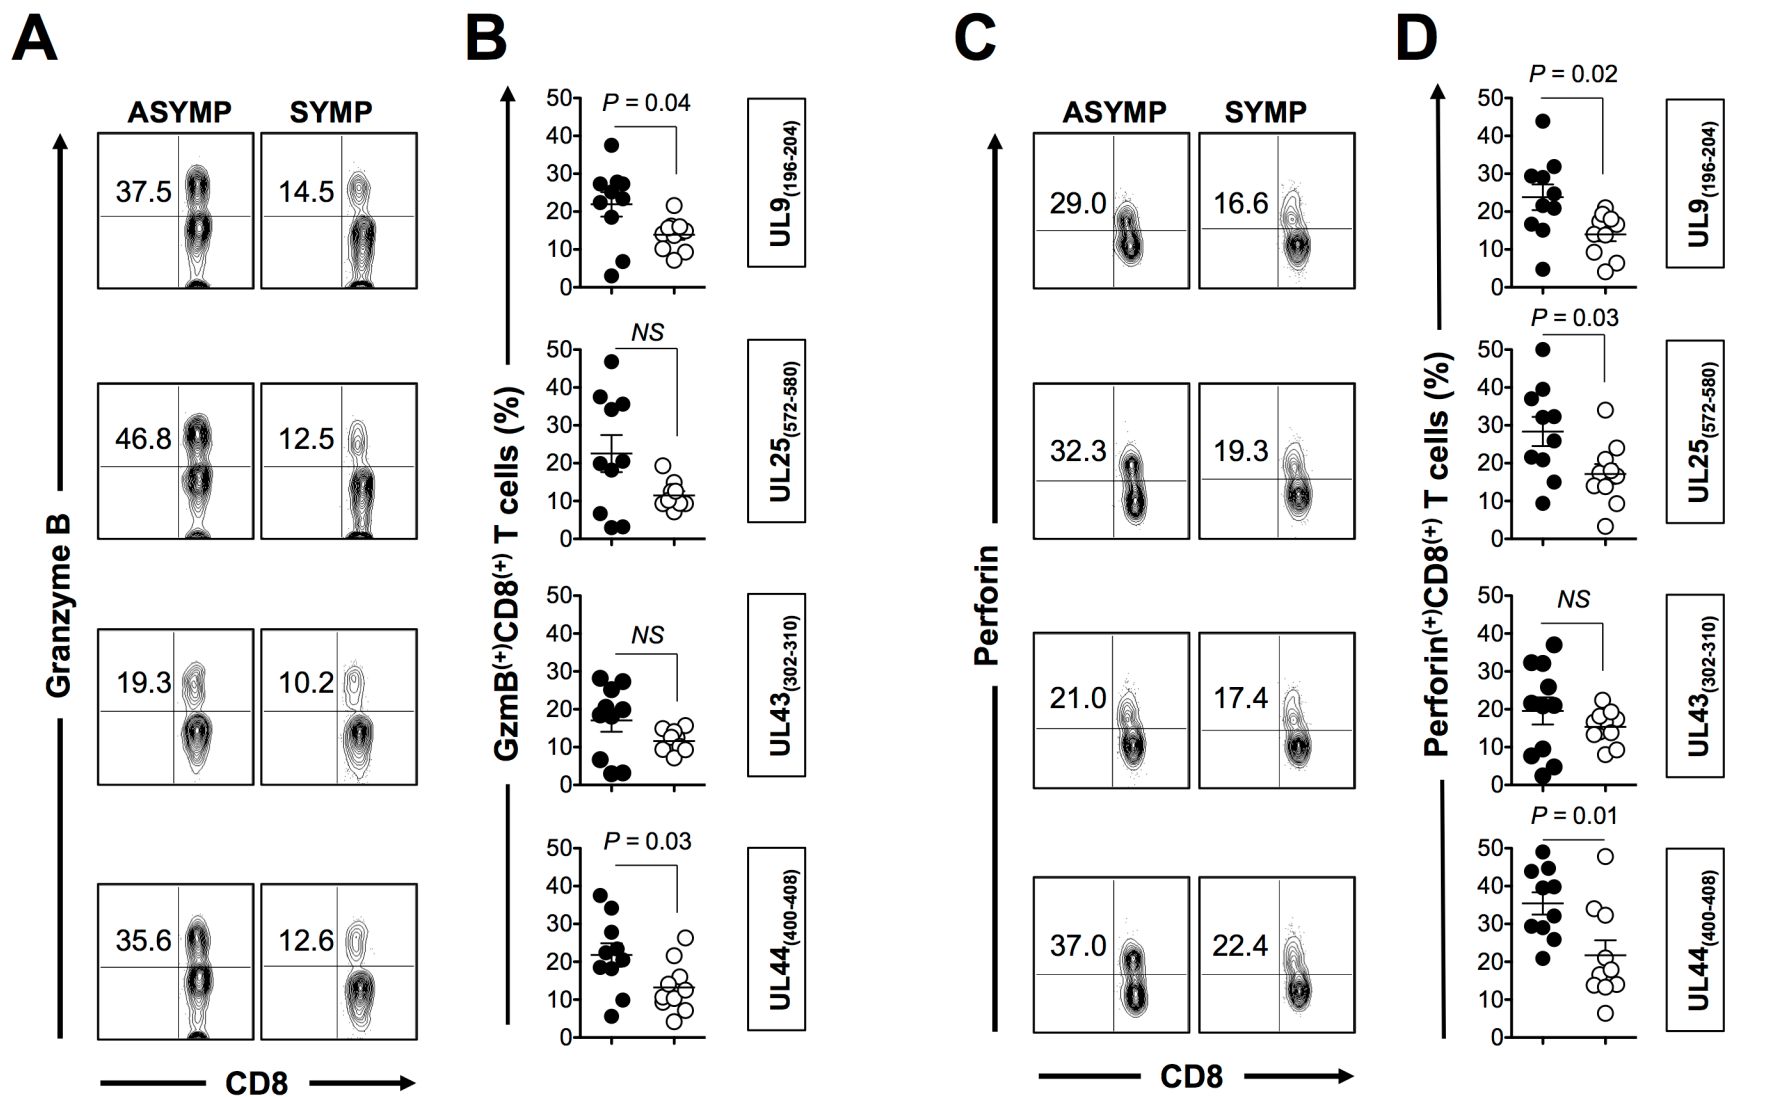

**Suppl. Figure S2: Frequencies of HSV-1 epitopes-specific cytotoxic CD8<sup>+</sup> T cells detected in HSV-seropositive ASYMP and SYMP individuals.** PBMCs ( $\sim 10 \times 10^6$ ) derived from 10 HSV-1 seropositive HLA-A\*0201<sup>(+)</sup> ASYMP individuals vs. 10 HSV-1 seropositive HLA-A\*0201<sup>(+)</sup> SYMP individuals were stimulated *in vitro* for 72 hrs with each of four peptides (UL9<sub>196-204</sub>, UL25<sub>572-580</sub>, UL43<sub>302-310</sub> and UL44<sub>400-408</sub> epitopes). Granzyme B and Perforin were then measured by intracellular staining as outlined in *Materials and Methods*. **(A)** Representative contour plots of percentage of Granzyme B<sup>+</sup>CD8<sup>+</sup> T cells *in vitro* stimulated with UL9<sub>196-204</sub>, UL25<sub>572-580</sub>, UL43<sub>302-310</sub> and UL44<sub>400-408</sub> epitopes in ASYMP (left side panel) and SYMP (right side panel) HSV-seropositive individuals. **(B)** Average frequencies of Granzyme B<sup>+</sup>CD8<sup>+</sup> T cells after *in vitro* stimulation with UL9<sub>196-204</sub>, UL25<sub>572-580</sub>, UL43<sub>302-310</sub> and UL44<sub>400-408</sub> epitopes in PBMCs isolated from ASYMP (closed circle) and SYMP (open circle) HSV-seropositive individuals. Significantly higher frequency of Granzyme B<sup>+</sup>CD8<sup>+</sup> T were detected in ASYMP individuals as compared to SYMP individuals when cells were *in vitro* stimulated with UL9<sub>196-204</sub>, UL25<sub>572-580</sub> and UL44<sub>400-408</sub> epitopes. We did not observe significant difference in average frequency of Granzyme B<sup>+</sup>CD8<sup>+</sup> T in ASYMP and SYMP individuals when cells were *in vitro* stimulated with UL43<sub>302-310</sub>. **(C)** Representative contour plots of percentage of Perforin<sup>+</sup>CD8<sup>+</sup> T cells *in vitro* stimulated with UL9<sub>196-204</sub>, UL25<sub>572-580</sub>, UL43<sub>302-310</sub> and UL44<sub>400-408</sub> epitopes in ASYMP (left side panel) and SYMP (right side panel) HSV-seropositive individuals. **(D)** Average frequencies of Perforin<sup>+</sup>CD8<sup>+</sup> T cells after *in vitro* stimulation with UL9<sub>196-204</sub>, UL25<sub>572-580</sub>, UL43<sub>302-310</sub> and UL44<sub>400-408</sub> epitopes in PBMCs isolated from ASYMP (closed circle) and SYMP (open circle) HSV-seropositive individuals. Significantly higher frequency of Perforin<sup>+</sup>CD8<sup>+</sup> T were detected in ASYMP individuals as compared to SYMP individuals when cells were *in vitro* stimulated with UL9<sub>196-204</sub>, UL25<sub>572-580</sub> and UL44<sub>400-408</sub> epitopes. We did not observe significant difference in average frequency of Perforin<sup>+</sup>CD8<sup>+</sup> T in ASYMP and SYMP individuals when cells were *in vitro* stimulated with UL43<sub>302-310</sub>.

Suppl. Table S1

| Peptide # | Sequence  | MW     | Protein                        | Position | A*0201 binding capacity (IC <sub>50</sub> nM) |          | T2 Assay MFI |     |     | Group of Peptides |
|-----------|-----------|--------|--------------------------------|----------|-----------------------------------------------|----------|--------------|-----|-----|-------------------|
|           |           |        |                                |          | Predicted                                     | Measured | 12μM         | 6μM | 3μM |                   |
| 1         | ALMGAVTSL | 862.1  | Capsid Maturation Protease     | 480      | 11                                            | 2.1      | 70           | 48  | 28  | Gr #1 (n=18)      |
| 2         | VLFSGPSPL | 916.1  | Capsid Maturation Protease     | 385      | 17                                            | 0.40     | 0            | 0   | 0   |                   |
| 3         | SLQQELAHM | 1056.2 | Capsid Scaffold Protein        | 181      | 681                                           | 71       | 0            | 0   | 0   |                   |
| 4         | RLASLLTYA | 1007.2 | DNA Packaging Protein UL33     | 74       | 15                                            | 0.32     | 0            | 1   | 4   |                   |
| 5         | SLLYAGPI  | 934.1  | DNA Packaging Protein UL33     | 77       | 53                                            | 37       | 0            | 0   | 0   |                   |
| 6         | YLSRTQRLA | 1107.3 | DNA Packaging Protein UL33     | 68       | 1373                                          | 110      | 1.6          | 116 | 190 |                   |
| 7         | DMTPAELEV | 1004.1 | DNA Packaging Protein UL33     | 49       | 6576                                          | 669      | 440          | 267 | 105 |                   |
| 8         | TLRDTIPDC | 1033.2 | DNA Packaging Protein UL33     | 12       | 19458                                         | 1391     | 36           | 21  | 2.3 |                   |
| 9         | ALGMRGLVL | 929.2  | Small Capsid Protein           | 19       | 3514                                          | 491      | 120          | 66  | 37  |                   |
| 10        | FLRGQAAAL | 946.1  | Small Capsid Protein           | 53       | 409                                           | 67       | 48           | 28  | 15  |                   |
| 11        | GQAAALTDL | 858.9  | Small Capsid Protein           | 56       | 2082                                          | 2301     | 180          | 106 | 50  |                   |
| 12        | VTTDSVRAL | 961.1  | Small Capsid Protein           | 12       | 12465                                         | 5353     | 0            | 0   | 0   |                   |
| 13        | GMRGLVLAT | 917.1  | Small Capsid Protein           | 21       | 8731                                          | 3661     | 180          | 174 | 132 |                   |
| 14        | KQLAAVARV | 955.2  | Membrane Protein UL45          | 100      | 17                                            | 40       | 102          | 119 | 87  |                   |
| 15        | VIIAALVLV | 910.2  | Membrane Protein UL45          | 40       | 19                                            | 5.9      | 36           | 32  | 22  |                   |
| 16        | SPGGFVQFV | 937.1  | Membrane Protein UL45          | 154      | 17905                                         | 450      | 213          | 164 | 171 |                   |
| 17        | RLVDGVGGI | 885.0  | Membrane Protein UL45          | 129      | 271                                           | 217      | 105          | 75  | 40  |                   |
| 18        | GVVIAALV  | 854.1  | Membrane Protein UL45          | 38       | 1744                                          | 1079     | 42           | 26  | 15  |                   |
| 19        | LLLRQWLHV | 1177.5 | Neurovirulence Protein ICP34.5 | 61       | 32                                            | 207      | 9            | 5.1 | 0   | Gr #2 (n=20)      |
| 20        | RLARRGSWA | 1072.2 | Neurovirulence Protein ICP34.5 | 197      | 6191                                          | 1409     | 62           | 44  | 18  |                   |
| 21        | VVWASAARL | 972.2  | Neurovirulence Protein ICP34.5 | 190      | 308                                           | 878      | 28           | 18  | 11  |                   |
| 22        | AVPTAQSQV | 900.0  | Neurovirulence Protein ICP34.5 | 21       | 6651                                          | 6173     | 14           | 26  | 7.6 |                   |
| 23        | VTAEHLARL | 1009.2 | Neurovirulence Protein ICP34.5 | 138      | 236.8                                         | 178      | 4.1          | 10  | 0   |                   |

|    |            |        |                                   |     |         |       |     |     |     |              |
|----|------------|--------|-----------------------------------|-----|---------|-------|-----|-----|-----|--------------|
| 24 | GLLRVGADT  | 901.0  | Tegument Protein US11             | 62  | 12167   | 23928 | 6.3 | 0.2 | 0.4 |              |
| 25 | SQTQPPAPV  | 924.0  | Tegument Protein US11             | 2   | 868     | 781   | 15  | 7.4 | 0   |              |
| 26 | TISKPSEAV  | 931.1  | Tegument Protein US11             | 71  | 4845    | 4777  | 140 | 120 | 106 |              |
| 27 | GMHPRGVHA  | 961.1  | Tegument Protein US11             | 26  | 4902    | 70000 | 148 | 127 | 87  |              |
| 28 | GPGDPDVYL  | 932.0  | Tegument Protein US11             | 11  | 23742.2 | 30626 | 68  | 34  | 26  |              |
| 29 | LLPEIAPNA  | 937.1  | TAP Transporter Inhibitor ICP47   | 57  | 106     | 30    | 59  | 60  | 53  |              |
| 30 | ALEMADTFL  | 1010.2 | TAP Transporter Inhibitor ICP47   | 4   | 1869    | 778   | 9.7 | 6.9 | 6.9 |              |
| 31 | EMADTFLDT  | 1042.1 | TAP Transporter Inhibitor ICP47   | 6   | 14178   | 1774  | 119 | 89  | 55  |              |
| 32 | IAPNASLGV  | 841.0  | TAP Transporter Inhibitor ICP47   | 61  | 5246    | 110   | 155 | 120 | 78  |              |
| 33 | AVHDPERPL  | 1033.2 | TAP Transporter Inhibitor ICP47   | 43  | 10444   | 3938  | 16  | 20  | 0.7 |              |
| 34 | LLLRQWLHV  | 1177.5 | Neurovirulence Protein ICP34.5    | 61  | 32      | 171   | 5.6 | 6.1 | 0.1 |              |
| 35 | MLFDQGTLV  | 1023.2 | Ubiquitin E3 Ligase ICP0          | 739 | 8       | 1.7   | 32  | 24  | 14  |              |
| 36 | KLVYLIVGV  | 1003.3 | Ubiquitin E3 Ligase ICP0          | 159 | 11      | 0.63  | 12  | 5.2 | 0.4 |              |
| 37 | SVVALSPYV  | 934.1  | Ubiquitin E3 Ligase ICP0          | 650 | 25      | 4.0   | 86  | 35  | 21  |              |
| 38 | YLTLGGHTV  | 960.1  | Ubiquitin E3 Ligase ICP0          | 212 | 25.8    | 6.0   | 44  | 5.1 | 7.4 |              |
| 39 | FLRYHCPGL  | 1105.3 | Envelope Glycoprotein L           | 71  | 49      | 188   | 10  | 5.3 | 4.5 | Gr #3 (n=20) |
| 40 | FLEDLSYPA  | 1054.2 | Envelope Glycoprotein L           | 103 | 10      | 0.64  | 15  | 10  | 6.6 |              |
| 41 | LLNNTTLTV  | 987.2  | Uracil-DNA Glycosylase            | 234 | 16      | 2.9   | 211 | 202 | 0   |              |
| 42 | SISPIDWSV  | 1003.1 | Uracil-DNA Glycosylase            | 326 | 23      | 3.2   | 5.3 | 7.6 | 9.9 |              |
| 43 | SLRNVLAHV  | 942.1  | Uracil-DNA Glycosylase            | 202 | 94      | 5.4   | 43  | 40  | 41  |              |
| 44 | FMVSSIDEL  | 1040.2 | Nuclear Protein UL3               | 101 | 11      | 1.1   | 100 | 66  | 40  |              |
| 45 | VTFDTLFMV  | 1072.3 | Nuclear Protein UL3               | 95  | 10      | 8.7   | 26  | 7.2 | 5.3 |              |
| 46 | LLVEVLREI  | 1083.3 | Nuclear Protein UL4               | 176 | 60      | 1.6   | 213 | 112 | 69  |              |
| 47 | FLQPTADLL  | 1017.2 | Nuclear Protein UL4               | 169 | 43.4    | 26    | 246 | 212 | 229 |              |
| 48 | GILTVVWTA  | 959.2  | Nuclear Protein UL4               | 120 | 57      | 2.1   | 209 | 170 | 166 |              |
| 49 | YMAKLHAYL  | 1109.4 | Helicase-Primase Helicase Subunit | 404 | 11      | 11    | 232 | 179 | 122 |              |
| 50 | FTLPVLTFFV | 1036.3 | Helicase-Primase Helicase Subunit | 423 | 9       | 1.1   | 153 | 140 | 127 |              |
| 51 | FMSVVNTNI  | 1024.2 | Helicase-Primase Helicase Subunit | 772 | 24      | 60    | 93  | 88  | 61  |              |
| 52 | YVLNSQIAV  | 1006.2 | Helicase-Primase Helicase Subunit | 494 | 18      | 121   | 211 | 203 | 172 |              |
| 53 | RMGELTAEI  | 1019.2 | Helicase-Primase Helicase Subunit | 576 | 19      | 91    | 172 | 166 | 142 |              |
| 54 | ELFGEAFEV  | 1040.1 | Helicase-Primase Helicase Subunit | 682 | 36      | 90    | 165 | 117 | 66  |              |
| 55 | GLISFYNFL  | 1073.3 | Helicase-Primase Helicase Subunit | 552 | 19      | 1.5   | 183 | 59  | 30  |              |

|    |           |        |                                   |     |      |       |     |     |     |              |
|----|-----------|--------|-----------------------------------|-----|------|-------|-----|-----|-----|--------------|
| 56 | MQFVDRFVV | 1140.4 | Helicase-Primase Helicase Subunit | 369 | 60   | 209   | 204 | 150 | 117 |              |
| 57 | ALQTDNYTL | 1038.1 | Helicase-Primase Helicase Subunit | 720 | 31   | 29    | 169 | 135 | 98  |              |
| 58 | VLDCVVTGA | 876.0  | Helicase-Primase Helicase Subunit | 113 | 69   | 973   | 228 | 199 | 157 |              |
| 59 | FVAPYFESV | 1058.2 | Capsid Portal Protein             | 565 | 10   | 8.7   | 178 | 140 | 125 | Gr #4 (n=26) |
| 60 | TLLDFAHGL | 986.1  | Capsid Portal Protein             | 134 | 12   | 10    | 191 | 167 | 125 |              |
| 61 | SMDDDTYVA | 1016.1 | Capsid Portal Protein             | 502 | 17   | 546   | 49  | 33  | 4.4 |              |
| 62 | ALAFDSTRV | 979.1  | Capsid Portal Protein             | 216 | 31   | 649   | 93  | 0   | 56  |              |
| 63 | FVADVQHAA | 957.1  | Capsid Portal Protein             | 616 | 29   | 7752  | 61  | 73  | 57  |              |
| 64 | KSMDDDTYV | 1073.1 | Capsid Portal Protein             | 501 | 78   | 689   | 55  | 27  | 60  |              |
| 65 | RLQTYLTDI | 1122.3 | Capsid Portal Protein             | 604 | 67   | 827   | 15  | 61  | 7.6 |              |
| 66 | QLQAAIFHA | 998.2  | Capsid Portal Protein             | 68  | 48   | 697   | 32  | 67  | 26  |              |
| 67 | YLDEAGGHL | 974.0  | Capsid Portal Protein             | 364 | 95   | 23    | 0   | 0.1 | 0   |              |
| 68 | LQAAIFHAL | 983.2  | Capsid Portal Protein             | 69  | 76   | 154   | 38  | 0   | 0   |              |
| 69 | VLNTLMFMV | 1067.4 | Tegument Protein UL7              | 192 | 10   | 14    | 58  | 53  | 0   |              |
| 70 | LLANNPPPV | 934.1  | Tegument Protein UL7              | 220 | 10   | 24    | 55  | 11  | 0   |              |
| 71 | FLRSCHWVL | 1160.4 | Tegument Protein UL7              | 185 | 29   | 582   | 5.3 | 39  | 0   |              |
| 72 | TLLRLACEV | 1017.3 | Tegument Protein UL7              | 37  | 48   | 65    | 27  | 41  | 0   |              |
| 73 | FVLPHWYMA | 1163.4 | Tegument Protein UL7              | 209 | 16   | 12    | 164 | 173 | 139 |              |
| 74 | LLDFELACL | 1036.3 | Tegument Protein UL7              | 136 | 61   | 63    | 77  | 76  | 64  |              |
| 75 | FTATSIARV | 965.1  | Tegument Protein UL7              | 55  | 22   | 74    | 22  | 17  | 12  |              |
| 76 | ELACLLMYL | 1068.4 | Tegument Protein UL7              | 140 | 73   | 54    | 34  | 26  | 20  |              |
| 77 | NTLMFMYVY | 1117.4 | Tegument Protein UL7              | 194 | 61   | 69    | 66  | 52  | 36  |              |
| 78 | RLDAEYWSV | 1138.2 | Helicase Primase Subunit          | 640 | 9    | 44    | 117 | 97  | 71  |              |
| 79 | ALLGAWPAV | 897.1  | Helicase Primase Subunit          | 343 | 9    | 2.5   | 276 | 242 | 234 |              |
| 80 | ALYACVLAA | 894.1  | Helicase Primase Subunit          | 100 | 15   | 5.6   | 57  | 24  | 24  |              |
| 81 | ALAPVFAFL | 948.2  | Helicase Primase Subunit          | 288 | 16   | 2.2   | 216 | 147 | 123 |              |
| 82 | LLGGVMAAV | 830.1  | Helicase Primase Subunit          | 475 | 25   | 25    | 222 | 219 | 207 |              |
| 83 | QLLDPPAAV | 923.1  | Helicase Primase Subunit          | 392 | 16   | 186   | 164 | 115 | 65  |              |
| 84 | VMAAVCLQI | 947.2  | Helicase Primase Subunit          | 479 | 29   | 15    | 176 | 154 | 123 |              |
| 85 | LLLQWLHV  | 1177.5 | Neurovirulence Protein ICP34.5    | 61  | 32   | 475   | 258 | 161 | 111 | Gr #5 (n=12) |
| 86 | RLARRGSWA | 1072.2 | Neurovirulence Protein ICP34.5    | 197 | 6191 | 24328 | 33  | 28  | 26  |              |
| 87 | VVWASAARL | 972.2  | Neurovirulence Protein ICP34.5    | 190 | 308  | 14967 | 155 | 143 | 106 |              |

|     |            |         |                                       |     |      |       |     |     |     |              |
|-----|------------|---------|---------------------------------------|-----|------|-------|-----|-----|-----|--------------|
| 88  | AVPTAQSQV  | 900.0   | Neurovirulence Protein ICP34.5        | 21  | 6651 | 14630 | 159 | 131 | 93  |              |
| 89  | VTAEHLARL  | 1009.2  | Neurovirulence Protein ICP34.5        | 138 | 237  | 21097 | 150 | 116 | 91  |              |
| 90  | GLDEQQLDV  | 1016.1  | Helicase-Primase Helicase Subunit     | 638 | 124  | 1179  | 106 | 73  | 45  |              |
| 91  | FLSRPINTI  | 1060.3  | Helicase-Primase Helicase Subunit     | 137 | 45   | 528   | 160 | 130 | 97  |              |
| 92  | SLTAHDFDV  | 1004.1  | Myristylated Tegument Protein         | 27  | 31   | 2727  | 199 | 184 | 141 |              |
| 93  | VLITDDGEV  | 960.1   | Myristylated Tegument Protein         | 17  | 298  | 3515  | 127 | 109 | 61  |              |
| 94  | LITDDGEVV  | 960.1   | Myristylated Tegument Protein         | 18  | 3181 | 13710 | 56  | 39  | 26  |              |
| 95  | YVPPDMRGV  | 1033.2  | Myristylated Tegument Protein         | 47  | 1488 | 511   | 96  | 90  | 63  |              |
| 96  | SEEEGNFYV  | 1073.1  | Myristylated Tegument Protein         | 40  | 9675 | 19233 | 221 | 201 | 145 |              |
| 97  | YFHALVYFV  | 1158.4  | Helicase-Primase Subunit              | 30  | 40   | 133   | 169 | 141 | 116 | Gr #6 (n=23) |
| 98  | GLARLDALV  | 927.1   | Helicase-Primase Subunit              | 437 | 41   | 13    | 254 | 202 | 143 |              |
| 99  | RLDALVVAA  | 927.1   | Helicase-Primase Subunit              | 440 | 40   | 44    | 147 | 126 | 85  |              |
| 100 | IIWGELFGV  | 1033.2  | A Replication Origin Binding Helicase | 734 | 8.5  | 2.3   | 236 | 184 | 112 |              |
| 101 | ALLEACL RV | 987.24  | A Replication Origin Binding Helicase | 587 | 9.5  | 6.6   | 223 | 218 | 151 |              |
| 102 | LLNNYDVLV  | 1062.22 | A Replication Origin Binding Helicase | 164 | 14   | 10    | 194 | 184 | 147 |              |
| 103 | DLAEWVPRV  | 1084.24 | A Replication Origin Binding Helicase | 41  | 32   | 4.3   | 298 | 258 | 237 |              |
| 104 | LLLHSLTPL  | 1006.26 | A Replication Origin Binding Helicase | 325 | 13   | 6.9   | 186 | 152 | 138 |              |
| 105 | ALMLRLLRI  | 1098.47 | A Replication Origin Binding Helicase | 196 | 35   | 46    | 398 | 355 | 308 |              |
| 106 | YLALLEACL  | 1008.26 | A Replication Origin Binding Helicase | 585 | 32   | 7.5   | 169 | 138 | 116 |              |
| 107 | FIYLALLEA  | 1052.29 | A Replication Origin Binding Helicase | 583 | 30   | 11    | 96  | 67  | 41  |              |
| 108 | VLDEVMSTL  | 1006.19 | A Replication Origin Binding Helicase | 172 | 23   | 45    | 190 | 140 | 83  |              |
| 109 | QLVDFLCGL  | 1007.22 | A Replication Origin Binding Helicase | 218 | 27   | 1.1   | 139 | 132 | 113 |              |
| 110 | LLAVAVYAV  | 918.14  | Envelope Glycoprotein M               | 102 | 10   | 5.8   | 145 | 164 | 146 |              |
| 111 | RTAWVWVCV  | 1206.43 | Envelope Glycoprotein M               | 23  | 9.4  | 26    | 146 | 122 | 109 |              |
| 112 | SQLAHLVYV  | 1029.2  | Envelope Glycoprotein M               | 162 | 9.4  | 62    | 302 | 284 | 271 |              |
| 113 | YVLHFACL V | 1064.32 | Envelope Glycoprotein M               | 169 | 15   | 7.6   | 188 | 184 | 161 |              |
| 114 | FLCTADAAV  | 910.07  | Envelope Glycoprotein M               | 227 | 15   | 3.0   | 130 | 116 | 96  |              |
| 115 | ILVVSLLLV  | 968.28  | Envelope Glycoprotein M               | 262 | 33   | 205   | 89  | 72  | 58  |              |
| 116 | SLLLVEGV   | 928.13  | Envelope Glycoprotein M               | 266 | 24   | 8.8   | 190 | 160 | 175 |              |
| 117 | WLLQITVLL  | 1098.39 | Envelope Glycoprotein M               | 148 | 20   | 130   | 169 | 153 | 159 |              |
| 118 | LLAVAVYA   | 932.17  | Envelope Glycoprotein M               | 101 | 21   | 93    | 183 | 159 | 145 |              |
| 119 | GMLICLTVL  | 962.29  | Envelope Glycoprotein M               | 251 | 37   | 548   | 83  | 57  | 39  |              |



|     |            |         |                                    |     |     |     |     |     |     |              |
|-----|------------|---------|------------------------------------|-----|-----|-----|-----|-----|-----|--------------|
| 120 | SLTAHDFDV  | 1004.07 | Myristylated Tegument Protein      | 27  | 31  | 621 | 31  | 29  | 15  | Gr #7 (n=17) |
| 121 | VLITDDGEV  | 960.05  | Myristylated Tegument Protein      | 17  | 298 | 926 | 106 | 55  | 41  |              |
| 122 | ALVELNSGV  | 901.02  | Deoxyribonuclease                  | 450 | 35  | 9.3 | 143 | 118 | 99  |              |
| 123 | YLCSLAVVL  | 980.24  | Deoxyribonuclease                  | 172 | 55  | 17  | 163 | 134 | 118 |              |
| 124 | VLMDGHTGM  | 960.14  | Deoxyribonuclease                  | 326 | 58  | 136 | 70  | 61  | 50  |              |
| 125 | LMDGHTGMV  | 960.14  | Deoxyribonuclease                  | 327 | 72  | 184 | 85  | 74  | 54  |              |
| 126 | GLGRHLWRL  | 1107.32 | Deoxyribonuclease                  | 189 | 40  | 133 | 154 | 94  | 55  |              |
| 127 | TLLELVVSV  | 972.19  | ument Serine/Threonine Protein Kin | 389 | 7.8 | 1.8 | 240 | 221 | 182 |              |
| 128 | GLAVDLYAL  | 934.1   | ument Serine/Threonine Protein Kin | 378 | 22  | 12  | 174 | 120 | 98  |              |
| 129 | FIAPLGFSL  | 964.18  | ument Serine/Threonine Protein Kin | 210 | 16  | 6.5 | 79  | 64  | 50  |              |
| 130 | KLCSPVFAI  | 977.24  | ument Serine/Threonine Protein Kin | 131 | 19  | 9.3 | 113 | 75  | 53  |              |
| 131 | RMFGMPTAL  | 1023.3  | ument Serine/Threonine Protein Kin | 329 | 20  | 5.5 | 78  | 59  | 33  |              |
| 132 | ALLAYRCVL  | 1021.3  | ument Serine/Threonine Protein Kin | 427 | 61  | 350 | 78  | 69  | 33  |              |
| 133 | ALHQCFTL   | 1061.24 | ument Serine/Threonine Protein Kin | 252 | 41  | 831 | 133 | 109 | 89  |              |
| 134 | AVLADFSLV  | 934.1   | ument Serine/Threonine Protein Kin | 297 | 69  | 134 | 114 | 91  | 46  |              |
| 135 | FMAAKAAHL  | 959.18  | Tegument Protein UL14              | 47  | 14  | 276 | 23  | 14  | 7   |              |
| 136 | ALGERLDAV  | 943.07  | Tegument Protein UL14              | 101 | 41  | 25  | 100 | 78  | 76  |              |
| 137 | ILMHATYFL  | 1108.38 | NA Packaging Terminase Subunit     | 208 | 7.1 | 1.2 | 176 | 147 | 113 | Gr #8 (n=25) |
| 138 | FLMAPDLYV  | 1068.31 | NA Packaging Terminase Subunit 1   |     | 6.4 | 6.4 | 164 | 157 | 118 |              |
| 139 | YLLEQLNNL  | 1119.28 | NA Packaging Terminase Subunit     | 676 | 8.0 | 5.7 | 126 | 102 | 84  |              |
| 140 | FLAPELVRA  | 1015.23 | NA Packaging Terminase Subunit     | 108 | 13  | 12  | 198 | 154 | 135 |              |
| 141 | LLFNSLYPA  | 1037.23 | NA Packaging Terminase Subunit 1   |     | 8.3 | 1.5 | 181 | 160 | 136 |              |
| 142 | LLMVAVIMAI | 1073.47 | NA Packaging Terminase Subunit 1   |     | 29  | 9.0 | 77  | 61  | 39  |              |
| 143 | YILNKPVFI  | 1106.37 | NA Packaging Terminase Subunit     | 433 | 20  | 52  | 178 | 147 | 88  |              |
| 144 | LMHATYFLA  | 1066.3  | NA Packaging Terminase Subunit     | 209 | 31  | 96  | 120 | 115 | 95  |              |
| 145 | KTWFLVPLI  | 1116.41 | NA Packaging Terminase Subunit     | 264 | 35  | 1.7 | 177 | 173 | 143 |              |
| 146 | FLNQANCKI  | 1050.24 | NA Packaging Terminase Subunit     | 372 | 61  | 458 | 247 | 230 | 197 |              |
| 147 | KMAQCTLAV  | 964.22  | Tegument Protein UL16              | 279 | 8.9 | 14  | 435 | 306 | 208 |              |
| 148 | RLPPNTFFA  | 1062.25 | Tegument Protein UL16              | 106 | 34  | 16  | 154 | 130 | 89  |              |
| 149 | VLTEPLCQV  | 1001.22 | Tegument Protein UL16              | 72  | 23  | 71  | 300 | 304 | 261 |              |
| 150 | AMSDDLGSL  | 908     | Tegument Protein UL16              | 212 | 94  | 978 | 36  | 19  | 13  |              |
| 151 | KIFRCLTVL  | 1092.42 | Tegument Protein UL16              | 65  | 56  | 159 | 198 | 156 | 108 |              |

|     |           |         |                                 |      |     |      |     |     |     |              |
|-----|-----------|---------|---------------------------------|------|-----|------|-----|-----|-----|--------------|
| 152 | ILFSYDELV | 1098.27 | A Packaging Tegument Protein UL | 146  | 8.9 | 5.6  | 359 | 339 | 302 |              |
| 153 | GLFVSLPVV | 930.15  | A Packaging Tegument Protein UL | 109  | 13  | 4.7  | 359 | 302 | 255 |              |
| 154 | ILLENLMRA | 1072.34 | A Packaging Tegument Protein UL | 529  | 18  | 19   | 234 | 215 | 161 |              |
| 155 | HLCRYVALL | 1087.36 | A Packaging Tegument Protein UL | 173  | 61  | 200  | 181 | 106 | 75  |              |
| 156 | ALATALTEA | 859.99  | A Packaging Tegument Protein UL | 421  | 28  | 10   | 220 | 190 | 136 |              |
| 157 | RLNNRPIAV | 1052.24 | A Packaging Tegument Protein UL | 600  | 40  | 20   | 87  | 90  | 81  |              |
| 158 | AVGELLAPV | 868.04  | A Packaging Tegument Protein UL | 85   | 28  | 84   | 161 | 167 | 145 |              |
| 159 | FTINIAAYL | 1025.22 | A Packaging Tegument Protein UL | 669  | 30  | 123  | 72  | 63  | 44  |              |
| 160 | ALMRGRPGL | 970.21  | A Packaging Tegument Protein UL | 42   | 77  | 1675 | 90  | 61  | 38  |              |
| 161 | FADSDGHYV | 1010.03 | A Packaging Tegument Protein UL | 580  | 54  | 142  | 112 | 101 | 79  |              |
| 162 | TLIPRLFAL | 1043.33 | Capsid Triplex Subunit 2        | 222  | 12  | 35   | 97  | 92  | 76  | Gr #9 (n=23) |
| 163 | RLPLYEALV | 1073.31 | Capsid Triplex Subunit 2        | 268  | 46  | 95   | 60  | 26  | 15  |              |
| 164 | ALVAWLTHA | 981.16  | Capsid Triplex Subunit 2        | 274  | 30  | 15   | 149 | 101 | 89  |              |
| 165 | SLLADVQQL | 986.13  | Capsid Triplex Subunit 2        | 187  | 32  | 28   | 168 | 146 | 128 |              |
| 166 | LVLNMVYSI | 1051.31 | Capsid Triplex Subunit 2        | 205  | 39  | 94   | 112 | 91  | 72  |              |
| 167 | IILTLIPRL | 1051.39 | Capsid Triplex Subunit 2        | 219  | 47  | 127  | 178 | 134 | 85  |              |
| 168 | RLDSLDTL  | 1045.21 | Capsid Triplex Subunit 2        | 129  | 76  | 101  | 117 | 91  | 75  |              |
| 169 | RLFDFFSRV | 1186.39 | Major Capsid Protein            | 34   | 7.7 | 0.20 | 116 | 99  | 94  |              |
| 170 | ALMAGYFKI | 1013.27 | Major Capsid Protein            | 1023 | 8.6 | 49   | 191 | 200 | 179 |              |
| 171 | SLMNVDAAV | 919.06  | Major Capsid Protein            | 465  | 11  | 9.7  | 149 | 143 | 123 |              |
| 172 | VLLEKAPPL | 979.23  | Major Capsid Protein            | 187  | 13  | 24   | 171 | 161 | 151 |              |
| 173 | RLLQSFLKV | 1103.37 | Major Capsid Protein            | 287  | 22  | 82   | 116 | 113 | 87  |              |
| 174 | FMQPDNANL | 1049.17 | Major Capsid Protein            | 531  | 15  | 47   | 125 | 106 | 74  |              |
| 175 | SLYDVEFDA | 1058.12 | Major Capsid Protein            | 48   | 17  | 9.7  | 209 | 142 | 105 |              |
| 176 | HLMRDPALL | 1065.31 | Major Capsid Protein            | 724  | 31  | 37   | 220 | 201 | 171 |              |
| 177 | GLFQEAYPL | 1037.19 | Major Capsid Protein            | 1326 | 15  | 5.4  | 156 | 130 | 96  |              |
| 178 | LLYNGAYHL | 1063.22 | Major Capsid Protein            | 1255 | 16  | 7.6  | 74  | 50  | 33  |              |
| 179 | ILFLWSFLV | 1137.43 | Envelope Protein UL20           | 65   | 7.4 | 0.36 | 226 | 222 | 201 |              |
| 180 | TMRDDLPLV | 1059.26 | Envelope Protein UL20           | 2    | 28  | 61   | 199 | 177 | 125 |              |
| 181 | FLARFWTRA | 1167.39 | Envelope Protein UL20           | 206  | 19  | 48   | 96  | 73  | 46  |              |
| 182 | FAASANFFL | 987.13  | Envelope Protein UL20           | 199  | 19  | 142  | 269 | 258 | 248 |              |
| 183 | FLWSFLVLK | 1152.44 | Envelope Protein UL20           | 67   | 172 | 1418 | 59  | 44  | 33  |              |

|     |            |         |                                 |     |     |      |     |     |     |               |
|-----|------------|---------|---------------------------------|-----|-----|------|-----|-----|-----|---------------|
| 184 | RLPPHTQPV  | 1044.23 | Envelope Protein UL20           | 51  | 36  | 31   | 111 | 91  | 67  |               |
| 185 | CLAEYCTSL  | 1002.2  | Tegument Protein UL21           | 118 | 15  | 186  | 179 | 153 | 111 | Gr #10 (n=23) |
| 186 | FVYTPSPYV  | 1072.24 | Tegument Protein UL21           | 161 | 8.4 | 129  | 154 | 109 | 84  |               |
| 187 | KLAVYYYII  | 1145.41 | Tegument Protein UL21           | 347 | 16  | 31   | 211 | 139 | 80  |               |
| 188 | RLSPFPALV  | 999.23  | Tegument Protein UL21           | 360 | 12  | 60   | 207 | 137 | 93  |               |
| 189 | YLGAFLSVL  | 982.19  | Tegument Protein UL21           | 458 | 18  | 16   | 54  | 34  | 20  |               |
| 190 | VLADAINGL  | 885.02  | Tegument Protein UL21           | 389 | 15  | 86   | 254 | 224 | 213 |               |
| 191 | RLTGVTSLV  | 945.13  | Tegument Protein UL21           | 481 | 39  | 13   | 144 | 135 | 96  |               |
| 192 | ELWWVFYAA  | 1184.36 | Tegument Protein UL21           | 286 | 61  | 288  | 54  | 37  | 10  |               |
| 193 | FLAASALGV  | 848.01  | gH                              | 805 | 8.2 | 7.4  | 193 | 173 | 132 |               |
| 194 | FLAGVPSAV  | 860.02  | gH                              | 530 | 8.6 | 5.9  | 168 | 138 | 112 |               |
| 195 | YLLGRPPNA  | 1000.17 | gH                              | 113 | 12  | 12   | 261 | 247 | 214 |               |
| 196 | LLAFDTQPV  | 1003.17 | gH                              | 790 | 16  | 9.3  | 266 | 233 | 217 |               |
| 197 | FILDALAQA  | 961.13  | gH                              | 602 | 17  | 2.6  | 208 | 182 | 140 |               |
| 198 | ALGYQLAFV  | 981.16  | gH                              | 471 | 21  | 12   | 192 | 173 | 155 |               |
| 199 | FVGVILGV   | 916.16  | gH                              | 7   | 42  | 5.9  | 159 | 140 | 129 |               |
| 200 | CLSDLLGFL  | 980.2   | gH                              | 104 | 75  | 88   | 199 | 126 | 65  |               |
| 201 | VLGCDAALV  | 860.04  | gH                              | 255 | 90  | 521  | 230 | 192 | 141 |               |
| 202 | RLQHLVAEI  | 1078.28 | gH                              | 452 | 38  | 142  | 110 | 82  | 60  |               |
| 203 | AMLAAIRRV  | 1000.28 | Thymidine Kinase                | 230 | 21  | 63   | 140 | 106 | 67  |               |
| 204 | ITMGMPYAV  | 982.24  | Thymidine Kinase                | 126 | 17  | 23   | 170 | 112 | 77  |               |
| 205 | LLANTVRYL  | 1062.28 | Thymidine Kinase                | 241 | 64  | 75   | 237 | 118 | 87  |               |
| 206 | FVALIPPTL  | 970.23  | Thymidine Kinase                | 190 | 62  | 704  | 170 | 84  | 36  |               |
| 207 | AVLAFVALI  | 916.17  | Thymidine Kinase                | 186 | 50  | 107  | 151 | 93  | 79  |               |
| 208 | YLCPVLVfV  | 1052.35 | Nuclear Protein UL24            | 144 | 7.8 | 9.5  | 354 | 318 | 331 | Gr #11 (n=23) |
| 209 | SLSTYTVPI  | 980.14  | Nuclear Protein UL24            | 183 | 11  | 13   | 489 | 486 | 431 |               |
| 210 | IVYLCPVLV  | 1018.33 | Nuclear Protein UL24            | 142 | 38  | 137  | 389 | 193 | 162 |               |
| 211 | FVAQRTRLRV | 1089.31 | Nuclear Protein UL24            | 151 | 34  | 942  | 42  | 39  | 24  |               |
| 212 | FLWEDQTL   | 1164.33 | A Packaging Tegument Protein UL | 367 | 6.7 | 0.65 | 434 | 364 | 358 |               |
| 213 | FMTALVLSL  | 994.27  | A Packaging Tegument Protein UL | 208 | 10  | 0.80 | 425 | 380 | 363 |               |
| 214 | YLACLAIVI  | 936.19  | A Packaging Tegument Protein UL | 270 | 18  | 61   | 398 | 355 | 308 |               |
| 215 | FIPQYLSAV  | 1037.23 | A Packaging Tegument Protein UL | 572 | 17  | 15   | 291 | 293 | 248 |               |

|     |           |         |                                   |     |     |      |     |     |     |               |
|-----|-----------|---------|-----------------------------------|-----|-----|------|-----|-----|-----|---------------|
| 216 | FWMSPVFNL | 1140.37 | A Packaging Tegument Protein UL   | 35  | 142 | 96   | 149 | 56  | 57  |               |
| 217 | AMQAAELPV | 929.11  | A Packaging Tegument Protein UL   | 70  | 21  | 32   | 323 | 242 | 186 |               |
| 218 | QLFPGLAAL | 929.13  | A Packaging Tegument Protein UL   | 462 | 21  | 16   | 72  | 57  | 47  |               |
| 219 | RLPRYLACL | 1104.4  | A Packaging Tegument Protein UL   | 266 | 62  | 76   | 245 | 249 | 163 |               |
| 220 | GLAVAMEV  | 788.96  | A Packaging Tegument Protein UL   | 130 |     | 25   | 224 | 209 | 161 |               |
| 221 | LLANGNVYA | 934.05  | A Packaging Tegument Protein UL   | 391 | 25  | 132  | 167 | 148 | 138 |               |
| 222 | ALMGAVTSL | 862.06  | Capsid Maturation Protease (UL26) | 480 | 11  | 4.2  | 374 | 275 | 237 |               |
| 223 | MMLRDRWSL | 1207.49 | Capsid Maturation Protease (UL26) | 221 | 15  | 14   | 277 | 268 | 222 |               |
| 224 | LLYLITNYL | 1125.38 | Capsid Maturation Protease (UL26) | 117 | 24  | 11   | 281 | 218 | 180 |               |
| 225 | LITNYLPSV | 1019.21 | Capsid Maturation Protease (UL26) | 120 | 16  | 5.2  | 203 | 162 | 122 |               |
| 226 | VLFSGPSPL | 916.09  | Capsid Maturation Protease (UL26) | 385 | 17  | 13   | 132 | 124 | 101 |               |
| 227 | MLRDRWSLV | 1175.42 | Capsid Maturation Protease (UL26) | 222 | 61  | 311  | 41  | 55  | 18  |               |
| 228 | ALSPVLPPM | 924.18  | Capsid Maturation Protease (UL26) | 299 | 20  | 30   | 315 | 298 | 278 |               |
| 229 | ALMGAVTSL | 862.06  | Capsid Maturation Protease (UL26) | 480 | 11  | 22   | 128 | 93  | 92  |               |
| 230 | VLFSGPSPL | 916.09  | Capsid Maturation Protease (UL26) | 385 | 17  | 7.9  | 94  | 79  | 73  |               |
| 231 | FLIAYQPLL | 1077.34 | gB                                | 448 | 6.6 | 0.31 | 193 | 209 | 189 | Gr #12 (n=27) |
| 232 | RMLGDVMAV | 991.24  | gB                                | 562 | 9.6 | 1.7  | 167 | 155 | 145 |               |
| 233 | YLANGGFLI | 967.13  | gB                                | 442 | 8.5 | 0.56 | 189 | 159 | 140 |               |
| 234 | ALLGLTLGV | 856.07  | gB                                | 17  | 11  | 1.3  | 118 | 120 | 111 |               |
| 235 | TMLEDHEFV | 1120.26 | gB                                | 676 | 16  | 118  | 189 | 170 | 152 |               |
| 236 | LLSNTLAEL | 973.14  | gB                                | 455 | 32  | 5.1  | 123 | 108 | 96  |               |
| 237 | FAFRYVNRL | 1185.4  | gB                                | 793 | 94  | 122  | 92  | 59  | 56  |               |
| 238 | EMIRYMALV | 1125.43 | gB                                | 845 | 38  | 179  | 34  | 23  | 11  |               |
| 239 | FVWVALLGL | 1017.27 | gB                                | 13  | 35  | 196  | 158 | 113 | 67  |               |
| 240 | KLLALLGQV | 954.21  | NA Packaging Terminase Subunit    | 14  | 16  | 33   | 103 | 84  | 71  |               |
| 241 | FLHDVENFL | 1133.27 | NA Packaging Terminase Subunit    | 142 | 11  | 12   | 159 | 160 | 138 |               |
| 242 | FLTPLSVTL | 990.22  | NA Packaging Terminase Subunit    | 72  | 17  | 4.7  | 243 | 241 | 247 |               |
| 243 | ALYYSVENV | 1057.17 | NA Packaging Terminase Subunit    | 626 | 14  | 38   | 233 | 205 | 180 |               |
| 244 | KQLNYCHLI | 1131.36 | NA Packaging Terminase Subunit    | 151 | 19  | 398  | 168 | 134 | 93  |               |
| 245 | ILYSVLQHL | 1085.31 | NA Packaging Terminase Subunit    | 764 | 24  | 55   | 284 | 211 | 148 |               |
| 246 | LLGQVQTYV | 1020.19 | NA Packaging Terminase Subunit    | 18  | 30  | 18   | 237 | 223 | 196 |               |
| 247 | VLPATFAAV | 888.08  | NA Packaging Terminase Subunit    | 538 | 33  | 11   | 162 | 94  | 69  |               |

|     |           |         |                                     |      |     |      |     |     |     |               |
|-----|-----------|---------|-------------------------------------|------|-----|------|-----|-----|-----|---------------|
| 248 | LLAKMLFYL | 1111.46 | Single Stranded DNA Binding Protein | 461  | 8.2 | 5.6  | 157 | 133 | 99  |               |
| 249 | YLSEEMMEL | 1144.35 | Single Stranded DNA Binding Protein | 1096 | 8.0 | 6.3  | 302 | 284 | 271 |               |
| 250 | FLSAKTLTV | 979.19  | Single Stranded DNA Binding Protein | 723  | 8.6 | 11   | 196 | 176 | 130 |               |
| 251 | FLLKQFHAA | 1074.29 | Single Stranded DNA Binding Protein | 817  | 16  | 53   | 53  | 39  | 21  |               |
| 252 | VMAARPMVV | 973.27  | Single Stranded DNA Binding Protein | 972  | 29  | 266  | 274 | 251 | 238 |               |
| 253 | YLARAAGLV | 933.12  | Single Stranded DNA Binding Protein | 364  | 51  | 210  | 78  | 107 | 89  |               |
| 254 | MLCGFSPAL | 938.19  | Single Stranded DNA Binding Protein | 453  | 15  | 8.5  | 201 | 150 | 48  |               |
| 255 | FMPDFSRVI | 1111.34 | Single Stranded DNA Binding Protein | 202  | 45  | 101  | 148 | 2.3 | 0   |               |
| 256 | SMFASCNLL | 985.2   | Single Stranded DNA Binding Protein | 961  | 15  | 29   | 224 | 261 | 231 |               |
| 257 | FLVPGTHVA | 940.11  | Single Stranded DNA Binding Protein | 408  | 27  | 45   | 111 | 113 | 75  |               |
| 258 | MLLAFMTLV | 1038.39 | DNA Polymerase Catalytic Subunit    | 446  | 7.0 | 5.7  | 189 | 234 | 196 | Gr #13 (n=26) |
| 259 | MLIKGVDLV | 987.26  | DNA Polymerase Catalytic Subunit    | 950  | 12  | 16   | 243 | 226 | 159 |               |
| 260 | FLLAKLTDI | 1033.28 | DNA Polymerase Catalytic Subunit    | 474  | 12  | 10   | 259 | 199 | 95  |               |
| 261 | YLCDNFCPA | 1045.22 | DNA Polymerase Catalytic Subunit    | 281  | 13  | 27   | 362 | 278 | 204 |               |
| 262 | FILDNPGFV | 1021.18 | DNA Polymerase Catalytic Subunit    | 303  | 13  | 11   | 374 | 275 | 237 |               |
| 263 | MLLATREYV | 1095.34 | DNA Polymerase Catalytic Subunit    | 844  | 12  | 46   | 169 | 135 | 85  |               |
| 264 | KLMARRAQV | 1072.34 | DNA Polymerase Catalytic Subunit    | 1057 | 15  | 795  | 103 | 80  | 24  |               |
| 265 | LLYDLSTTA | 996.14  | DNA Polymerase Catalytic Subunit    | 397  | 17  | 43   | 146 | 122 | 101 |               |
| 266 | GLLPCLHVA | 922.16  | DNA Polymerase Catalytic Subunit    | 826  | 22  | 18   | 275 | 271 | 259 |               |
| 267 | QLLADFPEA | 1003.13 | DNA Polymerase Catalytic Subunit    | 861  | 32  | 133  | 134 | 87  | 74  |               |
| 268 | FLASLVVLA | 932.17  | Nuclear Egress Lamina Protein       | 157  | 10  | 1.7  | 212 | 186 | 179 |               |
| 269 | RLIDRMLTA | 1088.35 | Nuclear Egress Lamina Protein       | 229  | 25  | 8.6  | 93  | 81  | 68  |               |
| 270 | MLYVIFPGT | 1040.3  | Nuclear Egress Lamina Protein       | 214  | 45  | 317  | 38  | 23  | 13  |               |
| 271 | TLSGMGYYL | 1004.18 | Nuclear Egress Lamina Protein       | 108  | 27  | 148  | 34  | 23  | 8.2 |               |
| 272 | SLFDCIVPV | 992.21  | DNA Packaging Protein UL32          | 454  | 6.4 | 0.17 | 233 | 236 | 202 |               |
| 273 | LLLAGTPAV | 854.06  | DNA Packaging Protein UL32          | 343  | 7.9 | 17   | 177 | 176 | 152 |               |
| 274 | CLLCNLLL  | 1003.34 | DNA Packaging Protein UL32          | 423  | 16  | 60   | 93  | 92  | 65  |               |
| 275 | LLLVRAYWL | 1146.44 | DNA Packaging Protein UL32          | 428  | 34  | 63   | 181 | 135 | 83  |               |
| 276 | LLDTGPFSA | 920.04  | DNA Packaging Protein UL32          | 108  | 23  | 93   | 172 | 108 | 51  |               |
| 277 | FALDRPCLV | 1033.27 | DNA Packaging Protein UL32          | 122  | 21  | 76   | 288 | 232 | 190 |               |
| 278 | FLCAKCLGA | 925.19  | DNA Packaging Protein UL32          | 153  | 51  | 137  | 151 | 105 | 76  |               |
| 279 | SLLSLEHTL | 1012.18 | DNA Packaging Protein UL32          | 584  | 28  | 55   | 135 | 122 | 104 |               |

|     |           |         |                                  |      |     |      |     |     |     |               |
|-----|-----------|---------|----------------------------------|------|-----|------|-----|-----|-----|---------------|
| 280 | HMFCDPMCA | 1054.32 | DNA Packaging Protein UL32       | 495  | 94  | 796  | 230 | 207 | 184 |               |
| 281 | SLLALNEAL | 943.11  | DNA Packaging Protein UL32       | 38   | 27  | 54   | 223 | 203 | 177 |               |
| 282 | RLASLLTYA | 1007.21 | DNA Packaging Protein UL33       | 74   | 15  | 7.9  | 83  | 62  | 33  |               |
| 283 | SLLTYAGPI | 934.11  | DNA Packaging Protein UL33       | 77   | 53  | 113  | 33  | 17  | 8.5 |               |
| 284 | RLMNDWAEV | 1133.29 | Nuclear Egress Membrane Protein  | 71   | 8.5 | 24   | 228 | 190 | 161 | Gr #14 (n=23) |
| 285 | VLGAIIWWV | 1014.22 | Nuclear Egress Membrane Protein  | 260  | 8.2 | 73   | 198 | 173 | 129 |               |
| 286 | FLRGQAAAL | 946.12  | Small Capsid Protein             | 53   | 409 | 589  | 77  | 53  | 33  |               |
| 287 | RMWAWIHGL | 1169.41 | Large Tegument Protein           | 2546 | 7.2 | 61   | 158 | 103 | 61  |               |
| 288 | ALPDTVAPV | 882.03  | Large Tegument Protein           | 2683 | 11  | 9.1  | 318 | 284 | 268 |               |
| 289 | AMDVLAAV  | 902.12  | Large Tegument Protein           | 2315 | 16  | 4.4  | 206 | 139 | 108 |               |
| 290 | FLSDSEAEA | 968     | Large Tegument Protein           | 3034 | 16  | 2.6  | 214 | 191 | 166 |               |
| 291 | VLLGAPVVV | 866.1   | Large Tegument Protein           | 2323 | 22  | 14   | 215 | 180 | 197 |               |
| 292 | RLQFGPPP  | 1010.21 | Large Tegument Protein           | 3072 | 16  | 11   | 134 | 104 | 94  |               |
| 293 | ALVACVAAL | 830.06  | Large Tegument Protein           | 1557 | 19  | 55   | 126 | 109 | 93  |               |
| 294 | QLFEAHPNV | 1054.17 | Large Tegument Protein           | 506  | 15  | 256  | 103 | 68  | 55  |               |
| 295 | YTFWRDLV  | 1212.42 | Large Tegument Protein           | 2120 | 13  | 30   | 183 | 145 | 102 |               |
| 296 | VLA AVLGA | 826.04  | Large Tegument Protein           | 2319 | 36  | 52   | 141 | 109 | 74  |               |
| 297 | LLMNELLRV | 1100.39 | Tegument Protein UL37            | 1028 | 8.3 | 8.4  | 193 | 157 | 137 |               |
| 298 | FLSSSALAV | 894.04  | Tegument Protein UL37            | 360  | 10  | 2.5  | 163 | 148 | 135 |               |
| 299 | LLAENLPGL | 939.12  | Tegument Protein UL37            | 105  | 9.5 | 1.1  | 223 | 222 | 177 |               |
| 300 | FLALVSNRV | 1018.22 | Tegument Protein UL37            | 237  | 15  | 7.4  | 164 | 183 | 140 |               |
| 301 | FLLSGTAIA | 892.07  | Tegument Protein UL37            | 68   | 14  | 2.0  | 297 | 233 | 240 |               |
| 302 | LLAQFQHTV | 1056.23 | Tegument Protein UL37            | 290  | 13  | 1.2  | 255 | 214 | 175 |               |
| 303 | ALLQQTWTL | 1073.26 | Tegument Protein UL37            | 393  | 16  | 0.39 | 323 | 286 | 245 |               |
| 304 | ALAVFQPAV | 915.1   | Tegument Protein UL37            | 365  | 13  | 1.6  | 377 | 261 | 233 |               |
| 305 | LLLISMYAL | 1036.35 | Tegument Protein UL37            | 735  | 20  | 4.7  | 291 | 293 | 248 |               |
| 306 | FVPYVLALV | 1020.28 | Tegument Protein UL37            | 620  | 21  | 0.90 | 345 | 327 | 244 |               |
| 307 | GLVSFNFLV | 995.18  | Capsid Triplex Subunit 1         | 182  | 8.7 | 0.50 | 378 | 333 | 248 | Gr #15 (n=23) |
| 308 | VILPACAFV | 932.2   | Capsid Triplex Subunit 1         | 285  | 21  | 6.2  | 318 | 305 | 273 |               |
| 309 | RLYRWQPD  | 1246.44 | Capsid Triplex Subunit 1         | 399  | 42  | 916  | 78  | 22  | 14  |               |
| 310 | LLLALRHPA | 1003.26 | Capsid Triplex Subunit 1         | 129  | 52  | 600  | 40  | 21  | 15  |               |
| 311 | YLREYVTRL | 1212.43 | Ribonucleotide Reductase Subunit | 401  | 14  | 115  | 303 | 215 | 160 |               |

|     |           |         |                                    |      |     |       |     |     |     |               |
|-----|-----------|---------|------------------------------------|------|-----|-------|-----|-----|-----|---------------|
| 312 | SLDAKQWSV | 1033.14 | Ribonucleotide Reductase Subunit   | 1025 | 9.0 | 7.5   | 319 | 267 | 236 |               |
| 313 | RLCLDVPPV | 1011.26 | Ribonucleotide Reductase Subunit   | 384  | 22  | 8.5   | 190 | 194 | 186 |               |
| 314 | RLLEVMSL  | 1075.3  | Ribonucleotide Reductase Subunit   | 1018 | 16  | 144   | 113 | 83  | 70  |               |
| 315 | RLTEDDFGL | 1065.16 | Ribonucleotide Reductase Subunit   | 366  | 28  | 77    | 145 | 117 | 75  |               |
| 316 | ALDHYDCLI | 1062.22 | Ribonucleotide Reductase Subunit   | 474  | 43  | 180   | 171 | 118 | 67  |               |
| 317 | ILIEGIFFA | 1022.26 | Ribonucleotide Reductase Subunit   | 184  | 7.5 | 0.17  | 189 | 210 | 208 |               |
| 318 | FLFAFLSAA | 986.19  | Ribonucleotide Reductase Subunit   | 85   | 8.5 | 0.80  | 202 | 199 | 146 |               |
| 319 | FLSAADDLV | 950.06  | Ribonucleotide Reductase Subunit   | 89   | 13  | 6.1   | 228 | 202 | 152 |               |
| 320 | ILMILIEGI | 1014.34 | Ribonucleotide Reductase Subunit   | 181  | 23  | 12    | 184 | 182 | 140 |               |
| 321 | ALAAIENYV | 963.1   | Ribonucleotide Reductase Subunit   | 277  | 12  | 2.7   | 85  | 79  | 72  |               |
| 322 | WLETELVFV | 1135.33 | Ribonucleotide Reductase Subunit   | 58   | 42  | 85    | 167 | 123 | 79  |               |
| 323 | ALSPALTAL | 856.04  | Ribonucleotide Reductase Subunit   | 7    | 31  | 194   | 60  | 37  | 26  |               |
| 324 | RVYNIQLV  | 1117.35 | Ribonucleotide Reductase Subunit   | 129  | 24  | 19691 | 2   | 0   | 3.4 |               |
| 325 | LLMGCDIVL | 976.27  | Tegument Host Shutoff Protein      | 217  | 17  | 2.3   | 312 | 334 | 290 |               |
| 326 | LLLMGCDIV | 976.27  | Tegument Host Shutoff Protein      | 216  | 137 | 94    | 228 | 233 | 143 |               |
| 327 | DLWNVMYTL | 1154.35 | Tegument Host Shutoff Protein      | 34   | 151 | 333   | 131 | 84  | 37  |               |
| 328 | KMSYPQFLA | 1084.31 | Tegument Host Shutoff Protein      | 45   | 30  | 1397  | 18  | 13  | 4.8 |               |
| 329 | FTQKSLFPI | 1080.3  | Tegument Host Shutoff Protein      | 70   | 26  | 84    | 130 | 86  | 59  |               |
| 330 | FLTTPVPSL | 974.18  | NA Polymerase Processivity Subunit | 291  | 13  | 111   | 198 | 135 | 106 | Gr #16 (n=22) |
| 331 | SLLDSSLVM | 990.23  | NA Polymerase Processivity Subunit | 53   | 25  | 76    | 234 | 210 | 149 |               |
| 332 | VLADDVYPL | 1004.15 | Envelope Protein UL43              | 138  | 7.2 | 2.4   | 313 | 299 | 264 |               |
| 333 | LLAPGPLFV | 926.17  | Envelope Protein UL43              | 148  | 10  | 5.6   | 304 | 278 | 217 |               |
| 334 | FLGAGALAV | 817.98  | Envelope Protein UL43              | 272  | 16  | 80    | 393 | 295 | 287 |               |
| 335 | GLFFSVYAL | 1016.21 | Envelope Protein UL43              | 389  | 14  | 23    | 180 | 145 | 116 |               |
| 336 | FMHIWLQAA | 1116.35 | Envelope Protein UL43              | 36   | 24  | 81    | 261 | 260 | 219 |               |
| 337 | TLRGLFFSV | 1039.25 | Envelope Protein UL43              | 386  | 46  | 94    | 359 | 302 | 255 |               |
| 338 | FLGGHVAVA | 870.01  | Envelope Protein UL43              | 302  | 34  | 65    | 377 | 261 | 233 |               |
| 339 | SVYALGFGV | 912.05  | Envelope Protein UL43              | 393  | 20  | 1296  | 9.5 | 0.5 | 13  |               |
| 340 | AVWISLAQV | 986.17  | Envelope Protein UL43              | 357  | 51  | 259   | 97  | 69  | 51  |               |
| 341 | GLVFRFSEV | 1053.23 | Envelope Protein UL43              | 340  | 84  | 262   | 42  | 42  | 54  |               |
| 342 | GLAVVLWSL | 957.17  | Envelope Glycoprotein C            | 7    | 15  | 17    | 169 | 180 | 168 |               |
| 343 | VLAAGVLVV | 840.06  | Envelope Glycoprotein C            | 485  | 15  | 234   | 137 | 138 | 117 |               |

|     |           |         |                                     |     |     |      |     |     |     |               |
|-----|-----------|---------|-------------------------------------|-----|-----|------|-----|-----|-----|---------------|
| 344 | SLLWLGAGV | 915.09  | Envelope Glycoprotein C             | 14  | 15  | 54   | 113 | 78  | 37  |               |
| 345 | FLGDDPSPA | 917.98  | Envelope Glycoprotein C             | 400 | 19  | 13   | 254 | 224 | 213 |               |
| 346 | RLTGYPAGI | 947.11  | Envelope Glycoprotein C             | 443 | 47  | 1099 | 241 | 228 | 206 |               |
| 347 | VLWSLLWLG | 1086.33 | Envelope Glycoprotein C             | 11  | 194 | 1.4  | 218 | 180 | 179 |               |
| 348 | LVVTAIVYV | 976.22  | Envelope Glycoprotein C             | 491 | 34  | 187  | 104 | 104 | 86  |               |
| 349 | VVTAIVYVV | 962.19  | Envelope Glycoprotein C             | 492 | 64  | 265  | 85  | 62  | 50  |               |
| 350 | VIIAALVLV | 910.2   | Membrane Protein UL45               | 40  | 19  | 212  | 184 | 146 | 139 |               |
| 351 | KQLAAVARV | 955.16  | Membrane Protein UL45               | 100 | 17  | 62   | 113 | 93  | 83  |               |
| 352 | RLNELLAYV | 1090.29 | Tegument Protein VP11/12            | 220 | 7.3 | 709  | 18  | 9.3 | 4.6 | Gr #17 (n=14) |
| 353 | RLARCLTPA | 1000.25 | Tegument Protein VP11/12            | 12  | 25  | 23   | 143 | 152 | 157 |               |
| 354 | ALSALLTKL | 929.17  | Tegument Protein VP11/12            | 702 | 35  | 313  | 106 | 83  | 81  |               |
| 355 | MLWTTDKHV | 1130.33 | Tegument Protein VP11/12            | 238 | 38  | 1293 | 23  | 20  | 13  |               |
| 356 | FLTCTDRSV | 1041.21 | Tegument Protein VP11/12            | 66  | 84  | 83   | 183 | 184 | 138 |               |
| 357 | HMGEVPPRL | 1035.24 | Tegument Protein VP11/12            | 521 | 191 | 1739 | 106 | 71  | 29  |               |
| 358 | RIQQYMFFM | 1263.56 | Tegument Protein VP11/12            | 197 | 82  | 81   | 127 | 102 | 94  |               |
| 359 | FLADAVVRL | 1003.21 | Tegument Protein VP13/14            | 286 | 7.6 | 52   | 181 | 160 | 134 |               |
| 360 | YLATGALLA | 892.07  | Tegument Protein VP13/14            | 392 | 20  | 55   | 92  | 65  | 36  |               |
| 361 | ALLDRDCRV | 1060.25 | Tegument Protein VP13/14            | 344 | 18  | 5.6  | 192 | 229 | 218 |               |
| 362 | RLLGFADTV | 991.16  | Tegument Protein VP13/14            | 545 | 30  | 27   | 202 | 212 | 187 |               |
| 363 | VLGAAVYAL | 876.06  | Tegument Protein VP13/14            | 497 | 23  | 100  | 164 | 129 | 56  |               |
| 364 | ALHTALATV | 896.06  | Tegument Protein VP13/14            | 504 | 21  | 16   | 147 | 127 | 92  |               |
| 365 | FADTVVACV | 924.09  | Tegument Protein VP13/14            | 549 | 43  | 59   | 189 | 195 | 171 |               |
| 366 | FLHLYLFLT | 1166.44 | Transactivating Tegument Protein VP | 227 | 21  | 564  | 103 | 105 | 88  | Gr #18 (n=18) |
| 367 | GLFQPFMFV | 1085.34 | Transactivating Tegument Protein VP | 268 | 12  | 37   | 154 | 137 | 100 |               |
| 368 | FLSTLPSDV | 978.12  | Transactivating Tegument Protein VP | 204 | 28  | 76   | 241 | 228 | 206 |               |
| 369 | LLDDLGFSA | 950.06  | Transactivating Tegument Protein VP | 65  | 18  | 46   | 158 | 122 | 92  |               |
| 370 | LMPSPMPV  | 968.26  | Transactivating Tegument Protein VP | 48  | 32  | 124  | 155 | 131 | 105 |               |
| 371 | FLTREILWA | 1148.38 | Transactivating Tegument Protein VP | 233 | 33  | 4.2  | 205 | 181 | 123 |               |
| 372 | MLDTWNEDL | 1136.25 | Transactivating Tegument Protein VP | 80  | 44  | 102  | 221 | 197 | 147 |               |
| 373 | VLANFCSAL | 937.13  | Transactivating Tegument Protein VP | 171 | 43  | 14   | 217 | 214 | 200 |               |
| 374 | AMHARMAAV | 957.19  | Tegument Protein VP22               | 210 | 21  | 19   | 172 | 133 | 110 |               |
| 375 | LLQRANELV | 1055.24 | Tegument Protein VP22               | 251 | 95  | 635  | 132 | 104 | 63  |               |



|     |           |         |                                      |     |     |      |     |     |     |               |
|-----|-----------|---------|--------------------------------------|-----|-----|------|-----|-----|-----|---------------|
| 376 | LLFVLLVAL | 1000.33 | Envelope Glycoprotein N              | 12  | 23  | 1132 | 28  | 23  | 15  |               |
| 377 | GLLFVLLVA | 944.22  | Envelope Glycoprotein N              | 11  | 133 | 1062 | 0   | 0.9 | 0   |               |
| 378 | FVYNYLTGV | 1011.18 | Deoxyuridine Triphosphatase          | 283 | 26  | 2.2  | 140 | 190 | 167 |               |
| 379 | SLNARGLLV | 942.12  | Deoxyuridine Triphosphatase          | 262 | 50  | 145  | 130 | 113 | 70  |               |
| 380 | RLQEALAVV | 998.19  | Tegument Protein UL51                | 34  | 13  | 6.6  | 131 | 138 | 118 |               |
| 381 | ALLPAPITL | 908.16  | Tegument Protein UL51                | 44  | 24  | 132  | 176 | 176 | 159 |               |
| 382 | ALGLSAFGV | 833.98  | Tegument Protein UL51                | 160 | 99  | 9.6  | 121 | 71  | 66  |               |
| 383 | ALAVVNALL | 883.09  | Tegument Protein UL51                | 38  | 53  | 18   | 140 | 115 | 91  |               |
| 384 | GLNGDSFRV | 964.04  | Helicase-Primase Primase Subunit     | 83  | 18  | 22   | 245 | 245 | 228 | Gr #19 (n=25) |
| 385 | KMMGRLADA | 992.23  | Helicase-Primase Primase Subunit     | 459 | 22  | 182  | 103 | 69  | 54  |               |
| 386 | RLAEAVVSA | 915.06  | Helicase-Primase Primase Subunit     | 563 | 18  | 75   | 162 | 154 | 141 |               |
| 387 | YIFSydayT | 1142.25 | Helicase-Primase Primase Subunit     | 49  | 22  | 310  | 39  | 35  | 25  |               |
| 388 | RLATHLRAV | 1036.25 | Helicase-Primase Primase Subunit     | 367 | 43  | 159  | 122 | 97  | 74  |               |
| 389 | LLIDTGVYA | 964.13  | Helicase-Primase Primase Subunit     | 809 | 24  | 94   | 177 | 131 | 100 |               |
| 390 | MILALTVAI | 944.25  | Helicase-Primase Primase Subunit     | 158 | 27  | 45   | 160 | 149 | 121 |               |
| 391 | FLYLAFVAL | 1056.32 | Envelope Glycoprotein K              | 131 | 14  | 1966 | 38  | 41  | 35  |               |
| 392 | YLLNYAGRI | 1082.27 | Envelope Glycoprotein K              | 161 | 21  | 194  | 127 | 124 | 89  |               |
| 393 | GLVLVWYTV | 1049.27 | Envelope Glycoprotein K              | 20  | 31  | 66   | 120 | 107 | 73  |               |
| 394 | KMNQTLLFL | 1107.38 | Envelope Glycoprotein K              | 56  | 22  | 907  | 63  | 37  | 7.9 |               |
| 395 | CMFGVVSPA | 910.13  | Envelope Glycoprotein K              | 144 | 28  | 9.5  | 132 | 136 | 117 |               |
| 396 | RLVVVGWFL | 1088.35 | Envelope Glycoprotein K              | 124 | 54  | 865  | 26  | 12  | 3.3 |               |
| 397 | AMNRRIMNV | 1104.36 | Envelope Glycoprotein K              | 100 | 38  | 1190 | 80  | 45  | 20  |               |
| 398 | LVWYTVFGA | 1055.24 | Envelope Glycoprotein K              | 23  | 39  | 346  | 59  | 19  | 16  |               |
| 399 | GLIVGTAFI | 890.09  | Envelope Glycoprotein K              | 230 | 42  | 251  | 201 | 204 | 172 |               |
| 400 | KMHFYLPGA | 1063.29 | Multifunctional Expression Regulator | 459 | 15  | 40   | 205 | 137 | 90  |               |
| 401 | FVYVILARL | 1077.38 | Multifunctional Expression Regulator | 428 | 32  | 720  | 37  | 25  | 6   |               |
| 402 | MLIDLGLDL | 1002.24 | Multifunctional Expression Regulator | 7   | 31  | 14   | 275 | 223 | 226 |               |
| 403 | ILDAARPAV | 806.98  | Multifunctional Expression Regulator | 62  | 26  | 99   | 364 | 298 | 252 |               |
| 404 | TIHCFFFAV | 1084.32 | Nuclear Protein UL55                 | 61  | 26  | 108  | 272 | 224 | 156 |               |
| 405 | GLLATPLFL | 944.19  | Membrane Protein UL56                | 106 | 19  | 27   | 285 | 207 | 188 |               |
| 406 | LLSGLPTYA | 934.11  | Membrane Protein UL56                | 129 | 47  | 177  | 261 | 142 | 96  |               |
| 407 | AVFGVVAIV | 874.08  | Membrane Protein UL56                | 216 | 32  | 250  | 184 | 144 | 121 |               |

|     |           |         |                       |      |     |      |     |     |     |               |
|-----|-----------|---------|-----------------------|------|-----|------|-----|-----|-----|---------------|
| 408 | AIVVVILV  | 938.25  | Membrane Protein UL56 | 222  | 93  | 6912 | 12  | 6.8 | 6   |               |
| 409 | MLFDQGTLV | 1023.22 | ICP0                  | 739  | 8.0 | 13   | 181 | 155 | 128 | Gr #20 (n=18) |
| 410 | KLVYLIVGV | 1003.28 | ICP0                  | 159  | 11  | 14   | 260 | 270 | 210 |               |
| 411 | YLTLGGHTV | 960.1   | ICP0                  | 212  | 26  | 141  | 232 | 196 | 159 |               |
| 412 | SVVALSPYV | 934.1   | ICP0                  | 650  | 25  | 268  | 152 | 95  | 49  |               |
| 413 | NIGAYVVLV | 947.13  | ICP0                  | 676  | 64  | 282  | 135 | 80  | 24  |               |
| 414 | LLLQWLHV  | 1177.45 | ICP34.5               | 61   | 32  | 130  | 343 | 251 | 181 |               |
| 415 | YLACELLPA | 992.22  | ICP4                  | 1050 | 8.5 | 0.35 | 393 | 295 | 287 |               |
| 416 | RLYPDAPPL | 1041.23 | ICP4                  | 1096 | 17  | 1.9  | 228 | 161 | 176 |               |
| 417 | ALDQACFRI | 1036.23 | ICP4                  | 402  | 28  | 103  | 210 | 120 | 118 |               |
| 418 | FLLTSLRRA | 1076.32 | ICP4                  | 465  | 41  | 6.1  | 280 | 243 | 211 |               |
| 419 | LLPAVQCAV | 913.15  | ICP4                  | 1055 | 42  | 63   | 229 | 206 | 168 |               |
| 420 | GLSCLLAL  | 860.09  | ICP4                  | 960  | 34  | 136  | 149 | 114 | 89  |               |
| 421 | GLAHAAAV  | 779.89  | ICP4                  | 444  | 38  | 82   | 240 | 161 | 110 |               |
| 422 | RMAAWMRQI | 1162.45 | ICP4                  | 914  | 44  | 193  | 211 | 176 | 121 |               |
| 423 | LLASMVEEA | 962.14  | ICP4                  | 86   | 38  | 51   | 277 | 268 | 222 |               |
| 424 | LTDHPLFPV | 1038.22 | ICP4                  | 844  | 27  | 221  | 331 | 311 | 300 |               |
| 425 | YMRQCINQL | 1168.41 | ICP22                 | 193  | 90  | 1533 | 139 | 91  | 69  |               |
| 426 | RTWCRLLQV | 1174.44 | ICP22                 | 238  | 37  | 337  | 175 | 146 | 113 |               |
| 427 | RLPHICYPV | 1097.36 | US2                   | 280  | 13  | 17   | 251 | 239 | 219 | Gr #21 (n=24) |
| 428 | RLAEPLMDL | 1057.29 | US2                   | 58   | 39  | 104  | 227 | 137 | 94  |               |
| 429 | GLFAEDSPL | 948.05  | US2                   | 88   | 50  | 68   | 313 | 262 | 250 |               |
| 430 | TLLDQNNAL | 1001.1  | US2                   | 10   | 50  | 39   | 221 | 173 | 133 |               |
| 431 | YQADLYTYL | 1149.28 | US3                   | 262  | 9.7 | 9.1  | 223 | 200 | 122 |               |
| 432 | KMDIDVEYL | 1125.31 | US3                   | 446  | 20  | 148  | 211 | 145 | 80  |               |
| 433 | YLSRRLNPL | 1131.35 | US3                   | 269  | 16  | 90   | 117 | 78  | 65  |               |
| 434 | QLLSAVDYI | 1021.18 | US3                   | 288  | 34  | 127  | 165 | 161 | 107 |               |
| 435 | IIPFLLVLV | 1026.37 | Glycoprotein G        | 12   | 102 | 55   | 309 | 268 | 234 |               |
| 436 | AVVPIIPFL | 968.25  | Glycoprotein G        | 8    | 57  | 1031 | 191 | 149 | 90  |               |
| 437 | GLLGSLVGA | 785.93  | Glycoprotein J        | 10   | 44  | 3.7  | 187 | 161 | 145 |               |
| 438 | RLGAVILFV | 987.25  | Glycoprotein D        | 7    | 14  | 12   | 186 | 186 | 172 |               |
| 439 | ILFVVIVGL | 972.27  | Glycoprotein D        | 12   | 23  | 450  | 106 | 91  | 70  |               |

|     |           |         |                                |      |     |      |     |     |     |               |
|-----|-----------|---------|--------------------------------|------|-----|------|-----|-----|-----|---------------|
| 440 | SLPITVYYA | 1026.21 | Glycoprotein D                 | 77   | 52  | 164  | 280 | 251 | 143 |               |
| 441 | FLGSCICFI | 1002.28 | Glycoprotein I                 | 288  | 8.3 | 12   | 255 | 231 | 219 |               |
| 442 | GLWVCATSL | 949.14  | Glycoprotein I                 | 13   | 26  | 36   | 190 | 158 | 115 |               |
| 443 | GLYLCVVYV | 1028.28 | Glycoprotein E                 | 355  | 8.0 | 47   | 219 | 218 | 169 |               |
| 444 | KLLWAVEPL | 1068.32 | Glycoprotein E                 | 52   | 9.9 | 12   | 165 | 108 | 95  |               |
| 445 | LLSALGLSV | 872.07  | Glycoprotein E                 | 429  | 31  | 8.9  | 201 | 165 | 159 |               |
| 446 | ILSPTAPSV | 884.05  | Glycoprotein E                 | 507  | 30  | 6.1  | 277 | 254 | 220 |               |
| 447 | GLAWQAASV | 902.01  | Glycoprotein E                 | 334  | 30  | 96   | 112 | 90  | 77  |               |
| 448 | VLVVQPAPV | 921.14  | Glycoprotein E                 | 158  | 77  | 112  | 234 | 211 | 171 |               |
| 449 | FVWQERAAV | 1105.26 | Glycoprotein E                 | 114  | 40  | 261  | 229 | 200 | 96  |               |
| 450 | AVVGFLGIV | 874.08  | Glycoprotein E                 | 5    | 57  | 10   | 239 | 233 | 233 |               |
| 451 | VLCGIAWYV | 1023.26 | Membrane Protein US8A          | 144  | 9.9 | 7.9  | 260 | 255 | 206 | Gr #22 (n=17) |
| 452 | GIAWYVTSI | 1009.17 | Membrane Protein US8A          | 147  | 43  | 143  | 14  | 1.4 | 1.6 |               |
| 453 | GMVIACLLV | 918.23  | Membrane Transport US9         | 66   | 83  | 252  | 204 | 183 | 149 |               |
| 454 | VIACLLVAV | 900.19  | Membrane Transport US9         | 68   | 27  | 205  | 225 | 177 | 164 |               |
| 455 | MVIACLLVA | 932.26  | Membrane Transport US9         | 67   | 63  | 166  | 64  | 45  | 27  |               |
| 456 | LLMACAFWC | 1057.38 | US10                           | 267  | 50  | 974  | 69  | 42  | 20  |               |
| 457 | FITTMAPRV | 1035.29 | US10                           | 250  | 49  | 32   | 113 | 108 | 94  |               |
| 458 | YLACELLPA | 992.22  | Transcriptional Regulator ICP4 | 1050 | 8.5 | 4.7  | 124 | 127 | 112 |               |
| 459 | RLYPDAPPL | 1041.23 | Transcriptional Regulator ICP4 | 1096 | 17  | 23   | 64  | 62  | 45  |               |
| 460 | ALDQACFRI | 1036.23 | Transcriptional Regulator ICP4 | 402  | 28  | 84   | 76  | 59  | 45  |               |
| 461 | FLLTSLRRA | 1076.32 | Transcriptional Regulator ICP4 | 465  | 41  | 85   | 56  | 50  | 35  |               |
| 462 | GLSCLLAAL | 860.09  | Transcriptional Regulator ICP4 | 960  | 34  | 208  | 49  | 42  | 23  |               |
| 463 | GLAHAAAAV | 779.89  | Transcriptional Regulator ICP4 | 444  | 38  | 3472 | 0   | 3.4 | 0   |               |
| 464 | RMAAWMRQI | 1162.45 | Transcriptional Regulator ICP4 | 914  | 44  | 326  | 44  | 17  | 0.8 |               |
| 465 | LLASMVEEA | 962.14  | Transcriptional Regulator ICP4 | 86   | 38  | 69   | 91  | 65  | 54  |               |
| 466 | LTDHPLFPV | 1038.22 | Transcriptional Regulator ICP4 | 844  | 27  | 140  | 102 | 97  | 93  |               |
| 467 | LMFDPRALA | 1033.27 | Transcriptional Regulator ICP4 | 858  | 56  | 762  | 0   | 0   | 0   |               |

**Suppl. Table S1: Binding affinity of 467 potential epitopes selected from HSV1 genome to HLA-A\*0201 molecules:** The list of 467 peptides and their proteins of origin is shown in top portion of the table. Predicted and measured binding affinity of genome-derived peptide epitopes to soluble HLA-A\*0201 molecule ( $IC_{50}$  nM) is shown in the bottom portion of the table. Quantitative assays to measure binding of each of 467 peptides to soluble HLA-A\*0201 molecules are based on inhibition of binding of a radiolabeled standard peptide, as recently described (41). 1-10nM of radiolabeled peptide was co-incubated with 1 $\mu$ M-1nM purified MHC and 1-3 $\mu$ M human  $\beta$ 2-microglobulin. After 2 days, binding of radiolabeled peptide to MHC class I molecules was determined by capturing MHC-peptide complexes on Greiner Lumitrac 600 micro plates coated with W6/32 antibody and measuring bond counts per minute using a Top count micro scintillation counter. Concentration of peptide yielding 50% inhibition of binding of radiolabeled probe peptide ( $IC_{50}$ ) was then calculated. To determine whether synthetic peptides could stabilize HLA-A\*0201 molecule expression on the T<sub>2</sub> cell surface, peptide-inducing HLA-A\*0201 up-regulation on T<sub>2</sub> cells was examined. Data presented here is percent increase in the expression of HLA-A\*0201 molecule on the T<sub>2</sub> cell surface which was calculated as “Percent of MFI increase = (MFI with the given peptide -MFI without peptide) / (MFI without peptide) x 100. The results are representative of 2 independent experiments.
